# Supplementary material for: Health Risk Assessment of PM2.5 and PM2.5-Bound Trace Elements in Thohoyandou, South Africa
Source: PubMed Central journal article supplement (PMC7908426; doi:10.3390/ijerph18031359), 2021-02-02

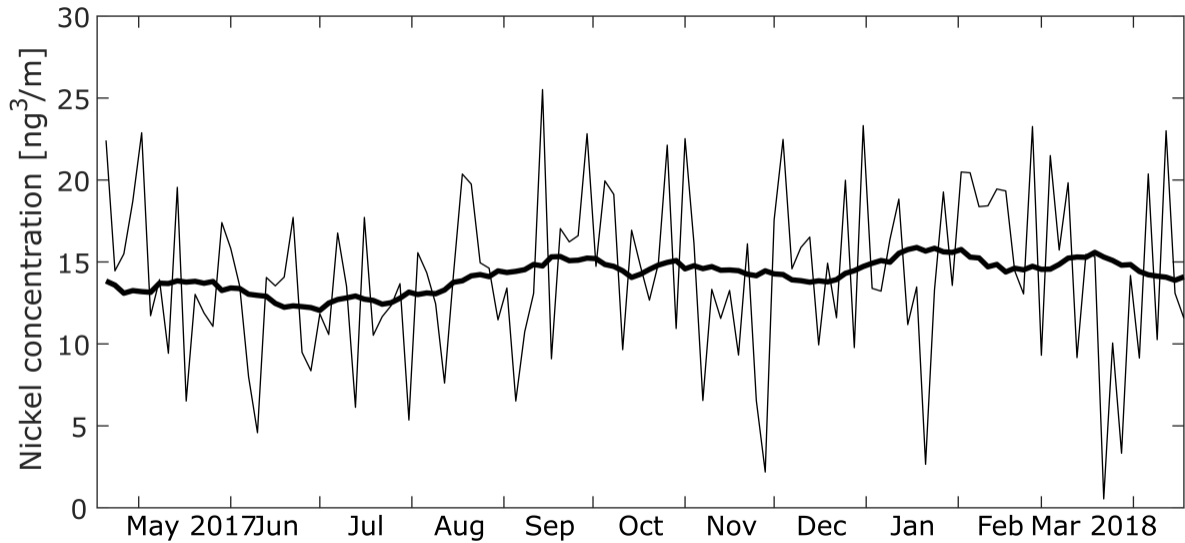

Supplement: ijerph-18-01359-s001.pdf [file ijerph-18-01359-s001.pdf]
